# Supplementary material for: FABP7 drives an inflammatory response in human astrocytes and is upregulated in Alzheimer’s disease
Source: PubMed Central journal article supplement (PMC10828232; doi:10.1007/s11357-023-00916-0), 2023-09-09
Supplement: 11357_2023_916_MOESM1_ESM.pdf [file 11357_2023_916_MOESM1_ESM.pdf]

**Supplemental table 1.** Sequence of primers used for real-time PCR.

| <b><i>Target gene</i></b> | <b><i>Forward (sequence 5'-3')</i></b> | <b><i>Reverse (sequence 5'-3')</i></b> |
|---------------------------|----------------------------------------|----------------------------------------|
| Mouse <i>Ccl5</i>         | CCAGAGAAGAAGTGGGTTCAAG                 | AGCAATGACAGGGAAGCTATAC                 |
| Mouse <i>Cxcl10</i>       | TCAGGCTCGTCAGTTCTAAGT                  | CCTTGGGAAGATGGTGGTTAAG                 |
| Mouse <i>Il6</i>          | TTTCCTCTGGTCTTCTGGAGTA                 | CTCTGAAGGACTCTGGCTTTG                  |
| Mouse <i>Nos2</i>         | AGGAGGAGAGAGATCCGATTTAG                | TCAGACTTCCCTGTCTCAGTAG                 |
| Mouse <i>Ptgs2</i>        | CGGACTGGATTCTATGGTGAAA                 | CTTGAAGTGGGTCAGGATGTAG                 |
| Mouse <i>Rplp0</i>        | CCTCCTTCTTCCAGGCTTTG                   | CCACCTTGTCTCCAGTCTTTATC                |
| Human <i>ACTIN</i>        | GGATCAGCAAGCAGGAGTATG                  | AGAAAGGGTGTAAACGCAACTAA                |
| Human <i>CCL5</i>         | TGCCACATCAAGGAGTATTT                   | GATGTAICTCCCGAACCCATTT                 |
| Human <i>CCR1</i>         | GACTATGACACGACCACAGAGT                 | CCAACCAGGCCAATGACAAATA                 |
| Human <i>CCR7</i>         | TGAGGTCACGGACGATTACAT                  | GTAGGCCACGAAACAAATGAT                  |
| Human <i>CD40</i>         | TTGGGGTCAAGCAGATTGCTA                  | GCAGATGACACATTGGAGAAGA                 |
| Human <i>CIITA</i>        | CCTGGAGCTTCTTAACAGCGA                  | TGTGTCCGGTTCTGAGTAGAG                  |
| Human <i>CXCL10</i>       | GTAATAACTCTACCCTGGCACTATAA             | GATGGGAAAGGTGAGGGAAATA                 |
| Human <i>GSDMD</i>        | GTGTGTCAACCTGTCTATCAAGG                | CATGGCATCGTAGAAGTGAAG                  |
| Human <i>IL6</i>          | GGAGACTTGCCTGGTGAAA                    | CTGGCTTGTTCTCACTACTC                   |
| Human <i>NOS2</i>         | GTCAGAGTCACCATCCTCTTTG                 | GCAGCTCAGCCTGTACTTATC                  |
| Human <i>PTGS2</i>        | TACTGGAAGCCAAGCACTTT                   | GGACAGCCCTTCACGTTATT                   |
